# Supplementary material for: Pt nanoparticles anchored by oxygen vacancies in MXenes for efficient electrocatalytic hydrogen evolution reaction
Source: Royal Society of Chemistry journal article supplement (doi:10.1039/d4nr00020j), 2024-01-01
Supplement: d4nr00020j1.pdf [file d4nr00020j1.pdf]

## Supplementary Information

### **Pt nanoparticles anchored by oxygen vacancies in MXene for efficient electrocatalytic hydrogen evolution reaction**

Qin Zhao<sup>a</sup>, Yue Zhang<sup>a</sup>, Changwang Ke<sup>a</sup>, Weilin Yang<sup>a</sup>, Jianshu Yue<sup>a</sup>, Xiaofei Yang<sup>a</sup>,  
Weiping Xiao<sup>a,b\*</sup>

<sup>a</sup> College of Science, Institute of Materials Physics and Chemistry, Nanjing Forestry University, Nanjing 210037, China

<sup>b</sup> Key Laboratory of Advanced Energy Materials Chemistry (Ministry of Education), College of Chemistry, Nankai University, Tianjin 300071, China

\*Corresponding author

E-mail address: [wp Xiao@njfu.edu.cn](mailto:wp Xiao@njfu.edu.cn)

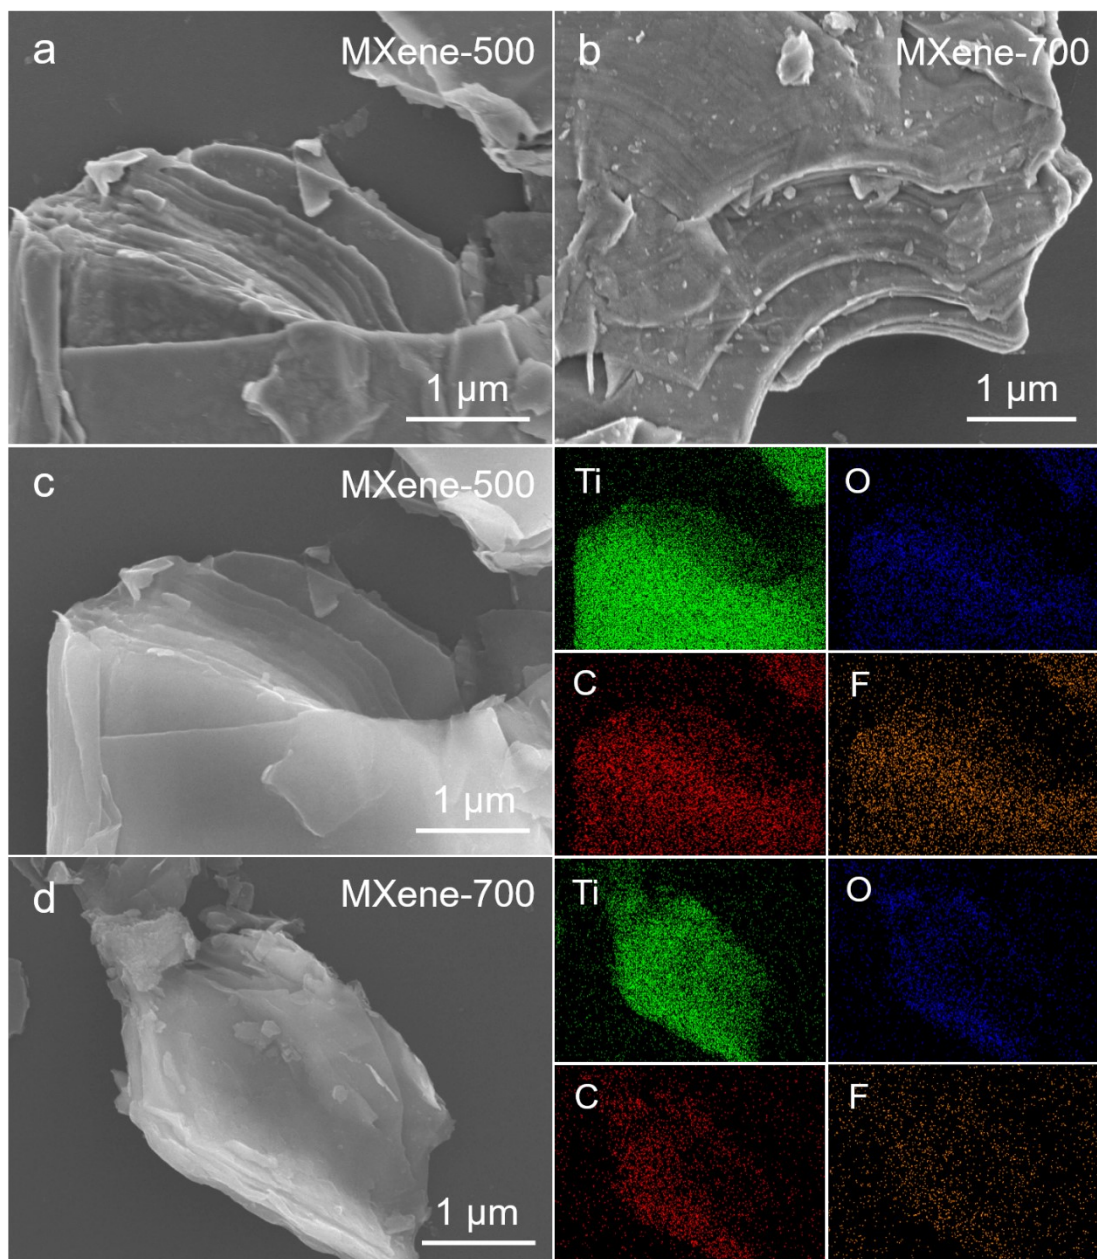

**Fig. S1** SEM images of (a) MXene-500 and (b) MXene-700. EDS elemental mapping images of (c) MXene-500 and (d) MXene-700.

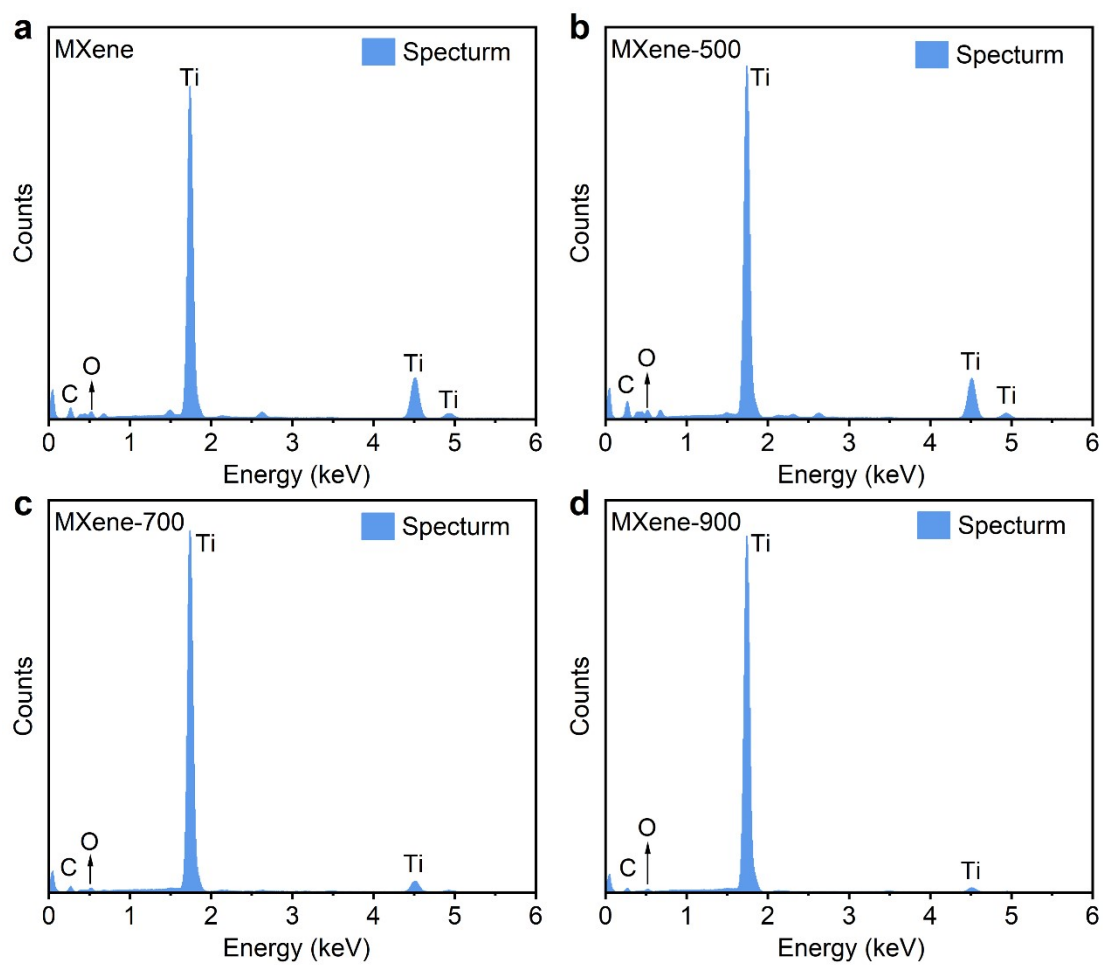

**Fig. S2** EDS spectrums of MXene, MXene-500, MXene-700 and MXene-900 catalysts.

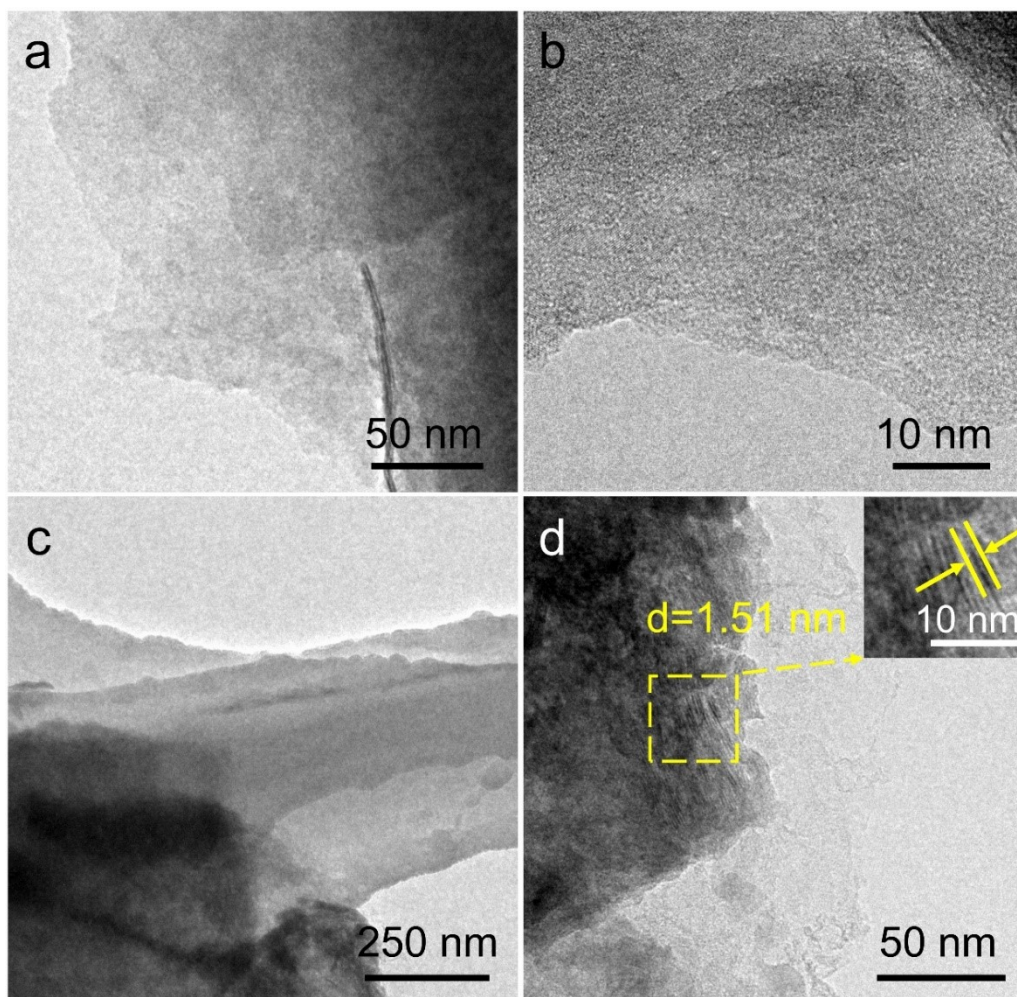

**Fig. S3** TEM images of (a, b) MXene and (c, d) MXene-900.

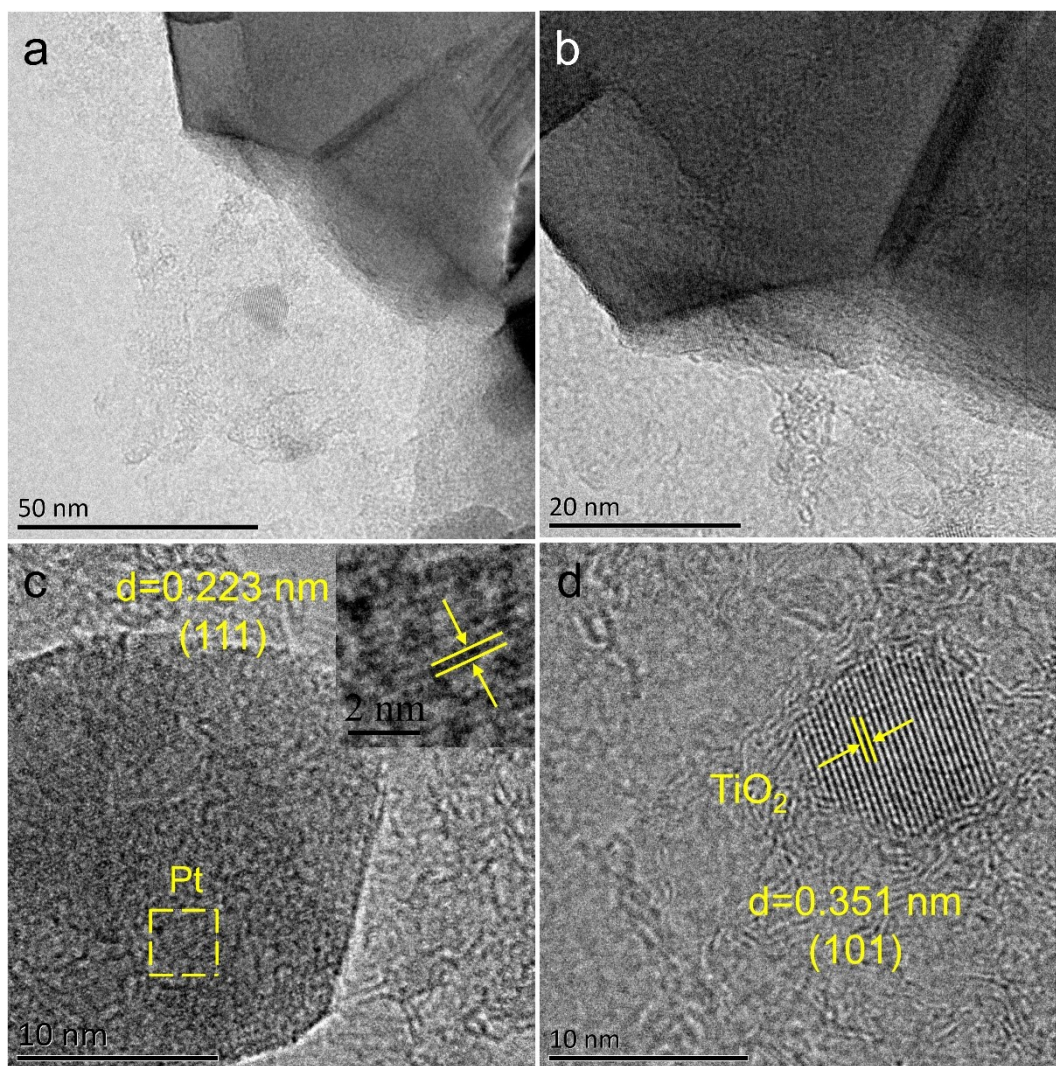

**Fig. S4** TEM and HRTEM images of 0.05-Pt/MXene-900.

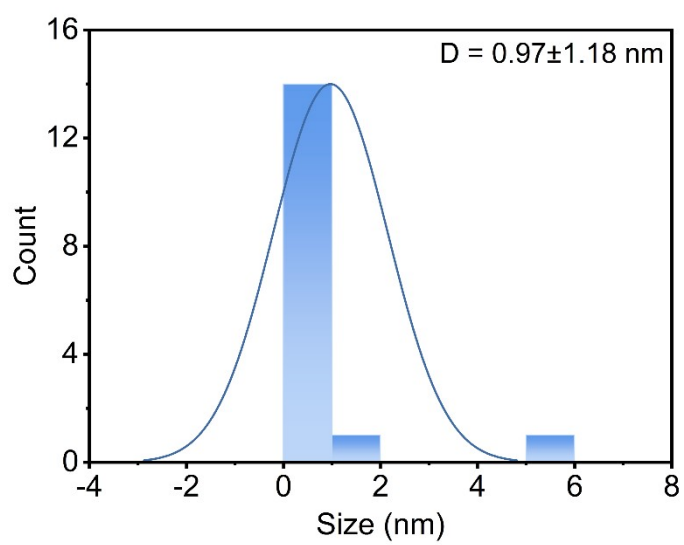

**Fig. S5** Particle size distribution of 0.05-Pt/MXene-900 catalyst.

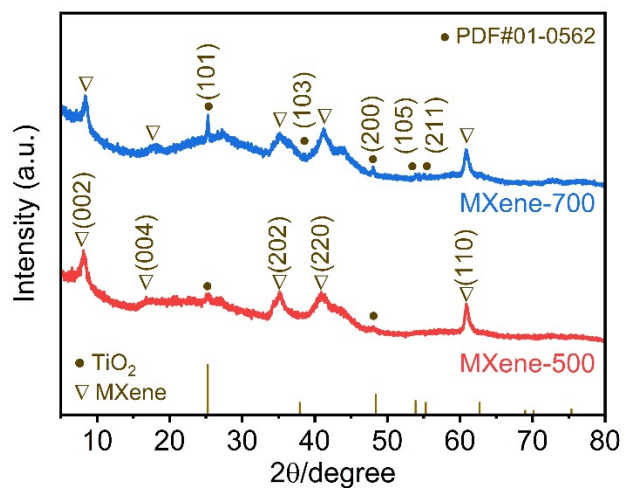

**Fig. S6** XRD pattern of MXene-500 and MXene-700 catalysts.

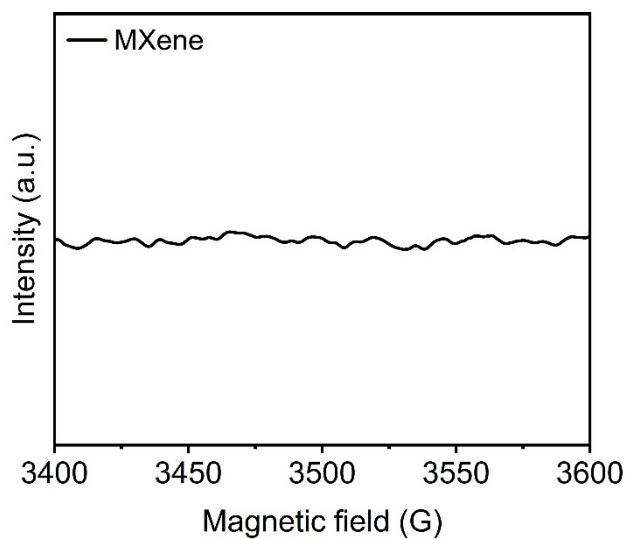

**Fig. S7** EPR of MXene.

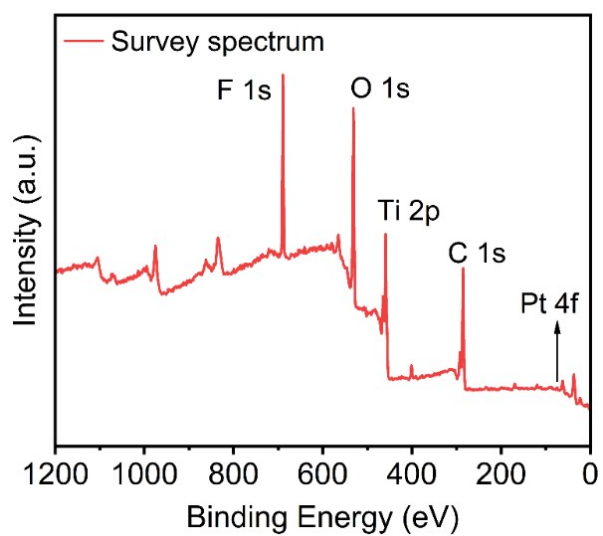

**Fig. S8** Survey XPS data of 0.05-Pt/MXene-900 catalyst.

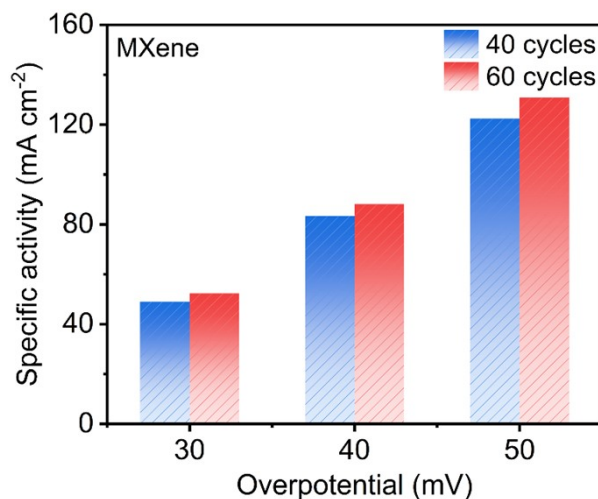

**Fig. S9** Specific activities of 0.2-Pt/MXene with deposition turns of 40, 60 circles.

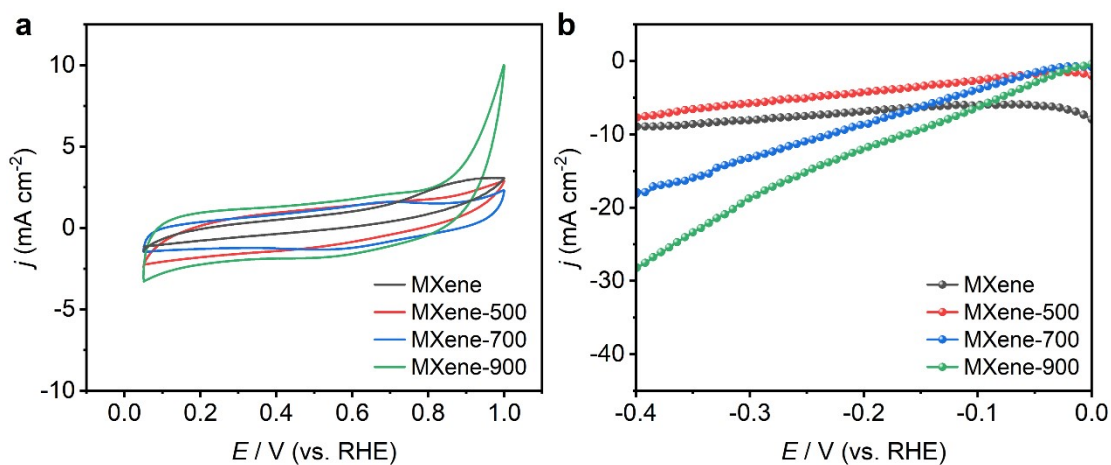

**Fig. S10** (a) CV curves and (b) LSV curves of MXene, MXene-500, MXene-700 and MXene-900 catalysts in 0.5 M H<sub>2</sub>SO<sub>4</sub> solution.

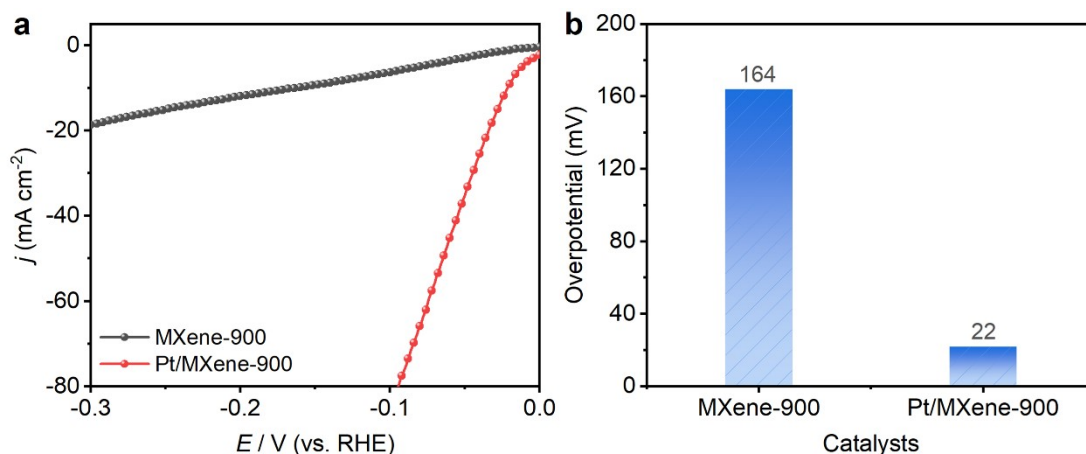

**Fig. S11** (a) LSV curves and (b) Overpotentials of MXene-900 and 0.05-Pt/MXene-900 catalysts in 0.5 M H<sub>2</sub>SO<sub>4</sub> solution.

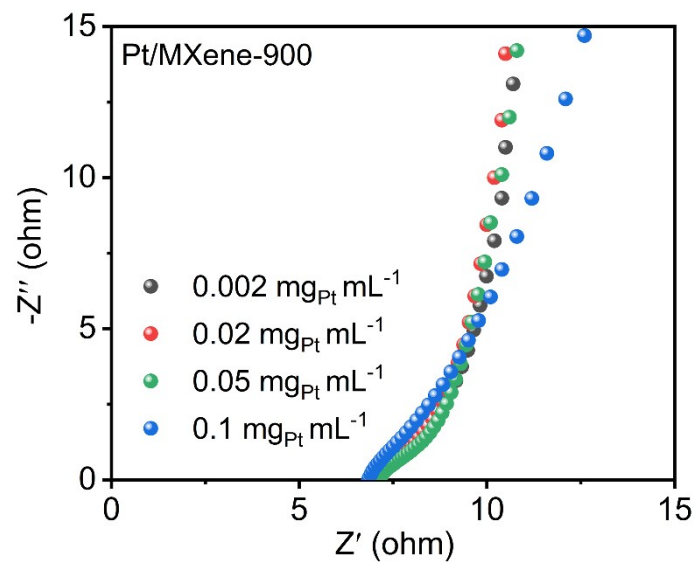

**Fig. S12** Nyquist plots of 0.002-Pt/MXene-900, 0.02-Pt/MXene-900, 0.05-Pt/MXene-900 and 0.1-Pt/MXene-900 in 0.5 M H<sub>2</sub>SO<sub>4</sub> for a deposition number of 60 circles.

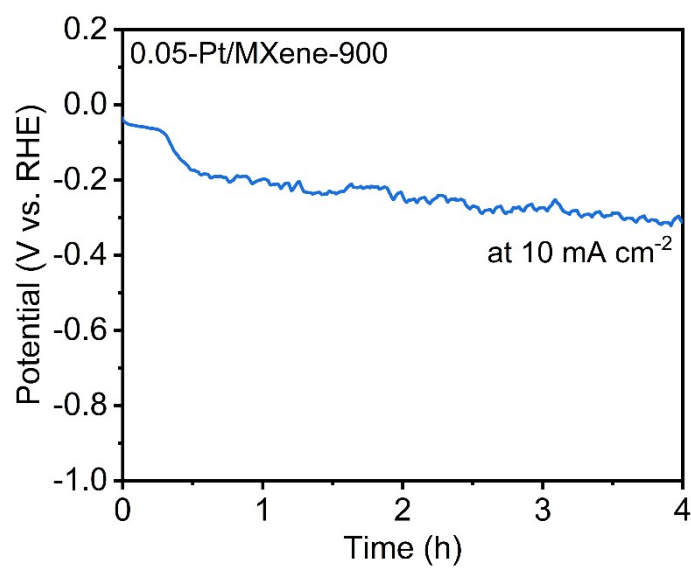

**Fig. S13** Chronopotentiometric curve of 0.05-Pt/MXene-900 measured at 10 mA cm<sup>-2</sup> in 0.5 M H<sub>2</sub>SO<sub>4</sub>.



**Table S1.** Comparison of HER catalytic activity of the fabricated 0.05-Pt/MXene-900 catalyst with other recently reported catalysts in 0.5 M H<sub>2</sub>SO<sub>4</sub> electrolyte.

| Catalysts                                                                                 | Overpotential (mV) | Tafel Slope (mV dec <sup>-1</sup> ) | Ref.      |
|-------------------------------------------------------------------------------------------|--------------------|-------------------------------------|-----------|
| 0.05-Pt/MXene-900                                                                         | 22                 | 42.41                               | This work |
| CoRe/CP                                                                                   | 45.1               | 40                                  | 1         |
| Ni <sub>3</sub> N/Ni@C750                                                                 | 172                | 63                                  | 2         |
| NiSe <sub>2</sub> @NC-500 °C                                                              | 161                | 63.2                                | 3         |
| MoS <sub>2</sub> /CoS <sub>2</sub> -<br>2@Mo <sub>2</sub> TiC <sub>2</sub> T <sub>x</sub> | 80                 | 108.3                               | 4         |
| NiMoP/C                                                                                   | 62                 | 91                                  | 5         |
| Rh-WO <sub>3</sub>                                                                        | 48                 | 84                                  | 6         |
| Co/MoS <sub>2</sub> @NPC                                                                  | 139                | 69                                  | 7         |
| Ni-Ti <sub>3</sub> C <sub>2</sub>                                                         | 187.25             | 67.21                               | 8         |
| Ru/MoO <sub>2</sub>                                                                       | 39                 | 50                                  | 9         |
| Rh-Rh <sub>2</sub> S <sub>3</sub> /C                                                      | 30                 | 33.1                                | 10        |
| NiS <sub>2</sub> /Co <sub>3</sub> S <sub>4</sub>                                          | 253                | 62                                  | 11        |
| CoRu/CNTs@Ti <sub>3</sub> C <sub>2</sub>                                                  | 74                 | 80                                  | 12        |

## References

- 1 H. Kim, J. Kim, G. H. Han, W. Guo, S. Hong, J. Park and S. H. Ahn, *J. Ind. Eng. Chem.*, 2021, **95**, 357–366.
- 2 D. Balaji, J. Madhavan, M. S. AlSalhi, M. J. Aljaafreh, S. Prasad and P. L. Show, *Int. J. Hydrogen Energy*, 2021, **46**, 30739–30749.
- 3 H. H. Do, Q. V. Le, T. H. Lee, S. H. Hong, S. H. Ahn, H. W. Jang and S. Y. Kim, *Int. J. Energy Res.*, 2021, **45**, 20463–20473.
- 4 C. K. Tang, X. Zheng, X. L. Chen, Y. G. Fu and Q. F. Lü, *FlatChem*, 2023, **42**, 100581.
- 5 A. M. Díez, X. Lyu, M. Pazos, M. Á. Sanromán, G. McCool, O. I. Lebedev, Y. V. Kolen'ko and A. Serov, *Electrochim. Acta*, 2023, **443**, 141923.
- 6 N. A. Nguyen, E. Chuluunbat, T. A. Nguyen and H. S. Choi, *Int. J. Hydrogen Energy*, 2023, **48**, 32686–32698.
- 7 Y. G. Fu, H. Q. Liu, C. Liu and Q. F. Lü, *J Alloy Compd.*, 2023, **967**, 171748.
- 8 K. Gothandapani, G. Tamil Selvi, R. Sofia Jennifer, V. Velmurugan, S. Pandiaraj, M. Muthuramamoorthy, S. Pitchaimuthu, V. Raghavan, A. C. Josephine Malathi, A. Alodhayb and A. Nirmala Grace, *Int. J. Hydrogen Energy*, 2023, S0360319923050875.
- 9 P. Ren, W. Wang, Y. Hong, Y. Zheng, X. Ren, W. Du, Y. Chen, S. Tan and W. Zhang, *ACS Appl. Nano Mater.*, 2023, **6**, 13926–13934.
- 10 S. Pan, C. Chang and Z. Yang, *Int. J. Hydrogen Energy*, 2023, **48**, 38655–38663.
- 11 C. Tao, T. Shen, L. Ma, X. Zhang, C. Wang, G. Huang and S. Xu, *Int. J. Hydrogen*

*Energy*, 2023, S0360319923061761.

- 12 Z. Li, M. Liu, S. Ma, Z. Jia and D. Jia, *ACS Appl. Energy Mater.*, 2023, **6**, 1519–1525.
